# Supplementary material for: Effect of Co-Doping on Cu/CaO Catalysts for Selective Furfural Hydrogenation into Furfuryl Alcohol
Source: MDPI journal article supplement (doi:10.3390/nano12091578), 2022-05-06
Supplement: s1 [file s1]

## Supplementary Information

# Effect of Co-Doping on Cu/CaO Catalysts for Selective Furfural Hydrogenation into Furfuryl Alcohol

Munsuree Kalong <sup>1</sup>, Sakhon Ratchahat <sup>1</sup>, Pongtanawat Khemthong <sup>2</sup>, Suttichai Assabumrungrat <sup>3,4</sup> and Atthapon Srifa <sup>1,\*</sup>

<sup>1</sup> Department of Chemical Engineering, Faculty of Engineering, Mahidol University, Nakhon Pathom 73170, Thailand; kalong.munsuree@gmail.com (M.K.); sakhon.rat@mahidol.edu (S.R.)

<sup>2</sup> National Nanotechnology Center (NANOTEC), National Science and Technology Development Agency (NSTDA), Pathum Thani 12120, Thailand; pongtanawat@nanotec.or.th

<sup>3</sup> Center of Excellence in Catalysis and Catalytic Reaction Engineering, Department of Chemical Engineering, Faculty of Engineering, Chulalongkorn University, Bangkok 10330, Thailand; suttichai.a@chula.ac.th

<sup>4</sup> Bio-Circular-Green-Economy Technology & Engineering Center (BCGeTEC), Department of Chemical Engineering, Faculty of Engineering, Chulalongkorn University, Bangkok 10330, Thailand

\* Correspondence: atthapon.sri@mahidol.edu

**Citation:** Kalong, M.; Ratchahat, S.; Khemthong, P.; Assabumrungrat, S.; Srifa, A. Effect of Co Doping on Cu/CaO Catalysts for Selective Furfural Hydrogenation into Furfuryl Alcohol. *Nanomaterials* 2022 12(9), 1578 <https://doi.org/10.3390/nano12091578>

Academic Editor(s): Alexandru Mihai Grumezescu

Received: 15 April 2022

Accepted: 4 May 2022

Published: date

**Publisher's Note:** MDPI stays neutral with regard to jurisdictional claims in published maps and institutional affiliations.

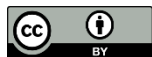

**Copyright:** © 2022 by the authors. Submitted for possible open access publication under the terms and conditions of the Creative Commons Attribution (CC BY) license (<https://creativecommons.org/licenses/by/4.0/>).

**Table S1.** Summary of binding energies of Cu2*p*, Co2*p*, and Ca2*p* and kinetic energies of Cu LMM from the XPS spectra.

| Catalyst                                | Cu2 <i>p</i><br>Binding energy (eV) |                  |       | Co2 <i>p</i><br>Binding energy (eV) |                  |                  |       | Ca2 <i>p</i><br>Binding energy (eV) | Cu LMM Auger<br>Kinetic energy (eV) |                  |                 |
|-----------------------------------------|-------------------------------------|------------------|-------|-------------------------------------|------------------|------------------|-------|-------------------------------------|-------------------------------------|------------------|-----------------|
|                                         | Cu <sup>+</sup> /Cu <sup>0</sup>    | Cu <sup>2+</sup> | Sat.  | Co <sup>0</sup>                     | Co <sup>3+</sup> | Co <sup>2+</sup> | Sat.  | Ca <sup>2+</sup>                    | Cu <sup>0</sup>                     | Cu <sup>2+</sup> | Cu <sup>+</sup> |
| Cu/Cao                                  | 932.5                               | 934.5            | 943.0 | -                                   | -                | -                | -     | 347.0                               | 918.7                               | 917.6            | 916.5           |
|                                         | 952.3                               | 954.0            | 963.7 |                                     |                  |                  |       | 350.5                               |                                     |                  |                 |
| Co <sub>1.40</sub> Cu <sub>1</sub> /CaO | 932.4                               | 934.3            | 942.8 | 779.2                               | 780.5            | 781.4            | 785.2 | 347.3                               | 918.7                               | 917.6            | 916.5           |
|                                         | 952.0                               | 954.3            | 963.0 | 794.3                               | 795.8            | 797.3            | 802.9 | 350.7                               |                                     |                  |                 |
| Co/CaO                                  | -                                   | -                | -     | 779.2                               | 780.5            | 781.4            | 785.2 | 347.1                               | -                                   | -                | -               |
|                                         |                                     |                  |       | 794.3                               | 795.8            | 797.3            | 802.9 | 350.6                               |                                     |                  |                 |

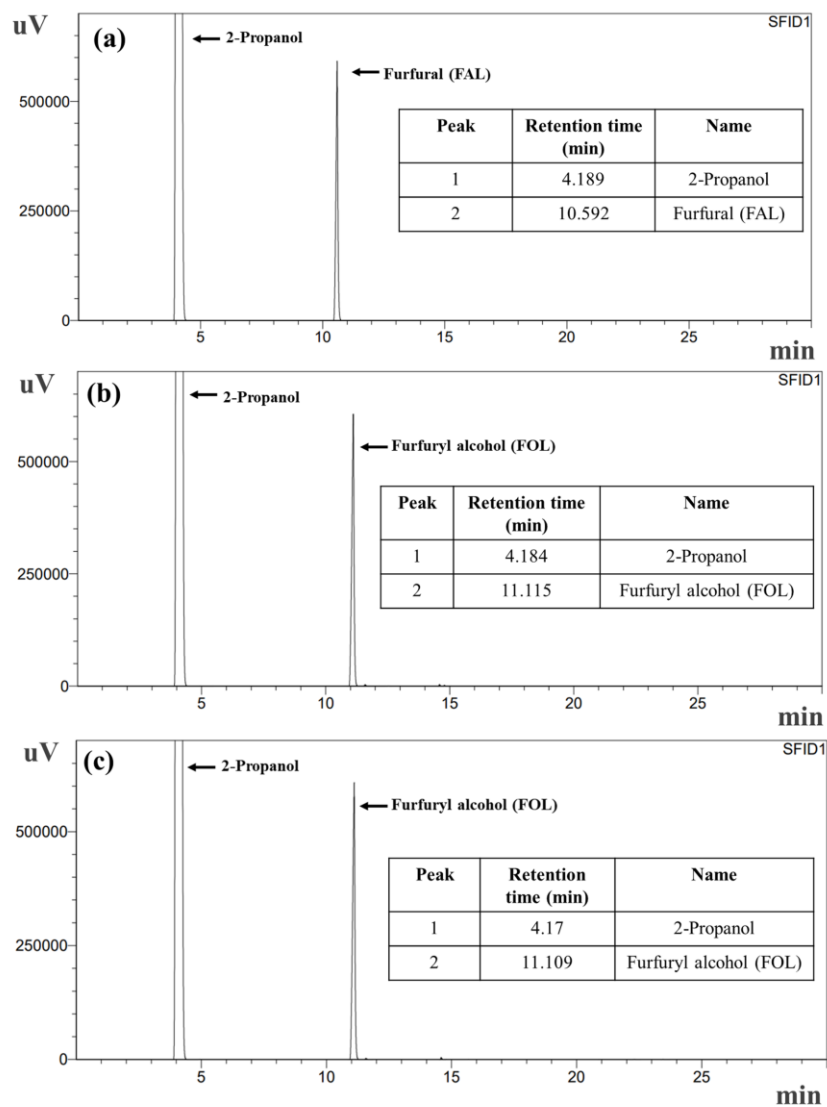

**Figure S1.** GC chromatograms of (a) FAL in 2-propanol before the reaction, and liquid product after reaction at 120°C,  $\text{H}_2$  pressure of 20 bar, and reaction time of 2 h over (b)  $\text{Co}_{1.40}\text{Cu}_1/\text{CaO}$  and (c)  $\text{Co}_{1.94}\text{Cu}_1/\text{CaO}$  catalysts.

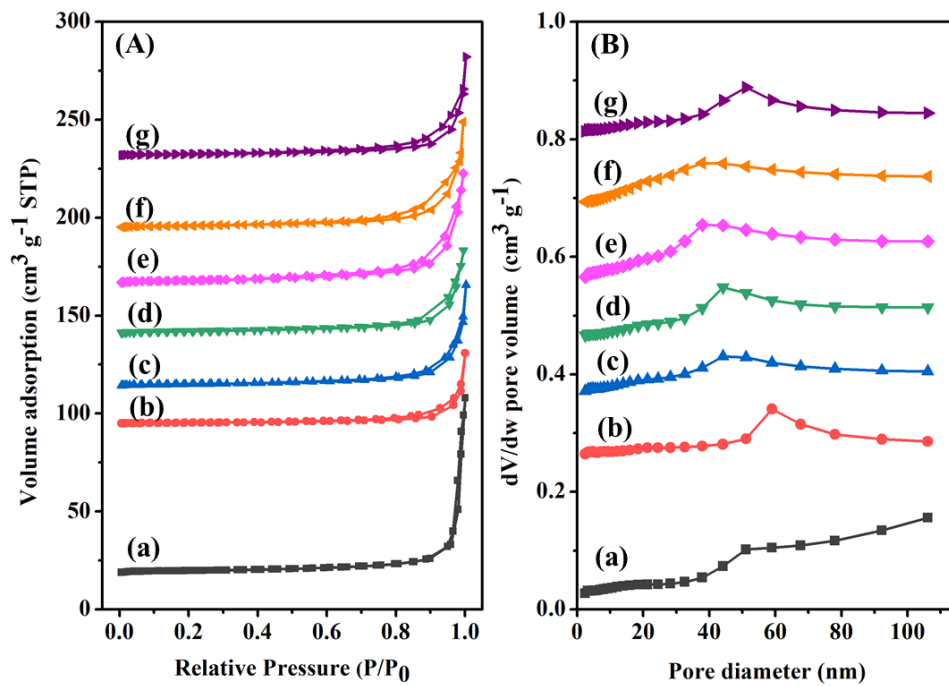

**Figure S2.** (A) N<sub>2</sub> adsorption and desorption isotherms, and (B) pore size distribution of (a) CaO, (b) Cu/CaO, (c) Co<sub>0.49</sub>Cu<sub>1</sub>/CaO, (d) Co<sub>0.96</sub>Cu<sub>1</sub>/CaO, (e) Co<sub>1.40</sub>Cu<sub>1</sub>/CaO, (f) Co<sub>1.94</sub>Cu<sub>1</sub>/CaO, and (g) Co/CaO catalysts.

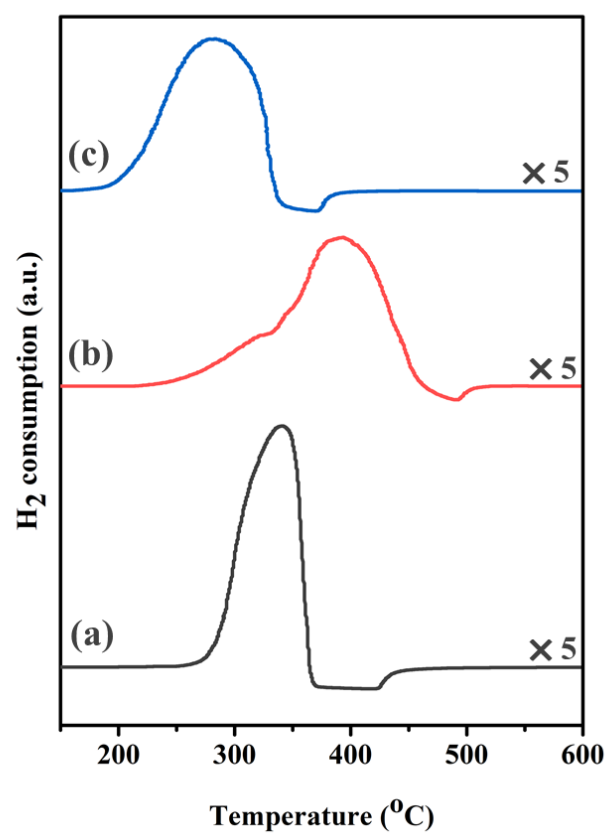

**Figure S3.** H<sub>2</sub>-temperature programmed reduction profiles of bulk (a) Cu, (b) Co, and (c) CoCu samples.

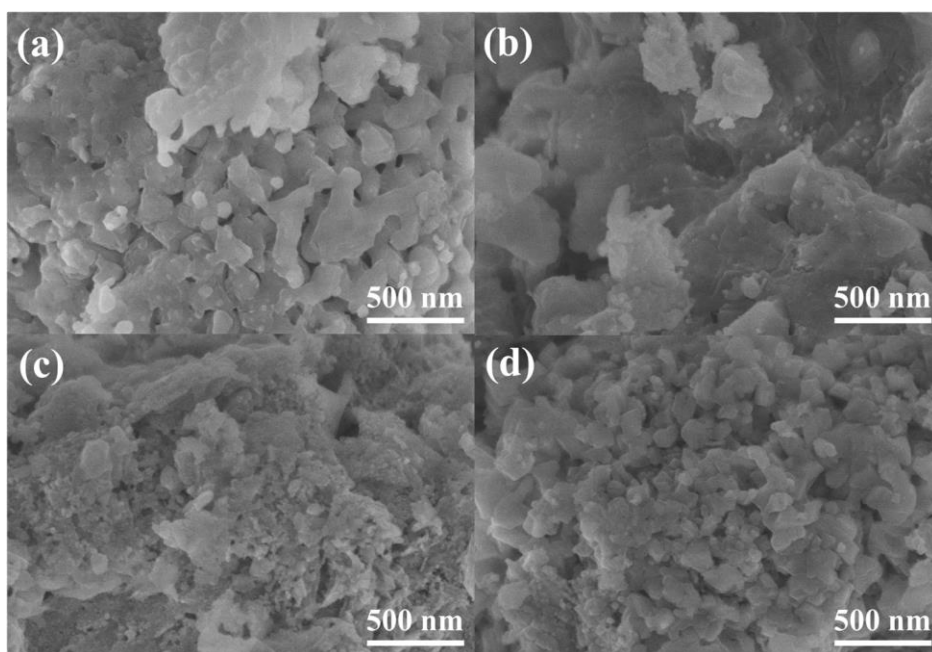

**Figure S4.** Representative FE-SEM images of the (a) CaO support, (b) Cu/CaO, (c) Co/CaO, and (d) Co<sub>1.40</sub>Cu<sub>1</sub>/CaO catalysts.

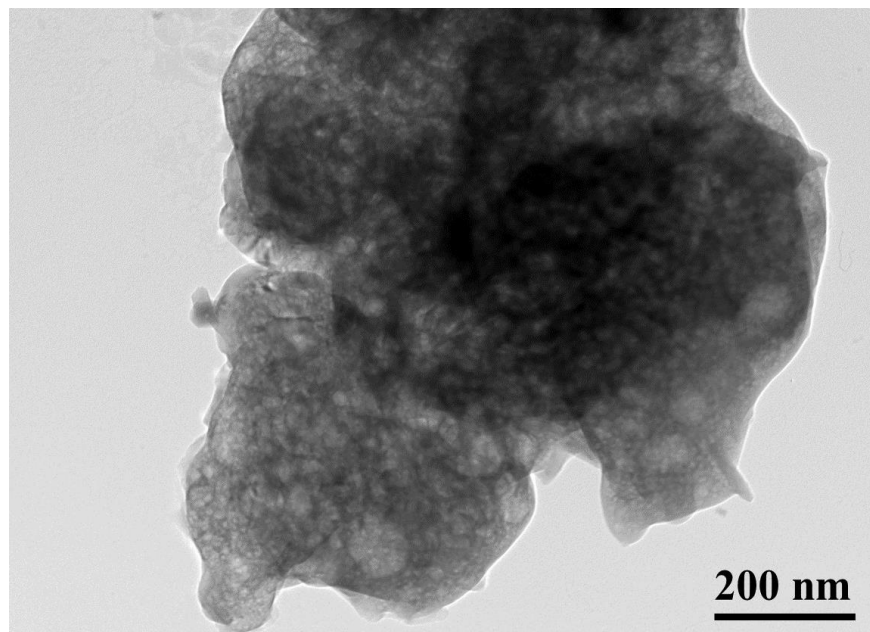

**Figure S5.** Typical TEM image of the bare CaO support.
